# Supplementary material for: A Multifaceted Computational Approach to Understanding the MERS-CoV Main Protease and Brown Algae Compounds’ Interaction
Source: MDPI journal article supplement (doi:10.3390/md21120626), 2023-11-30
Supplement: s1 [file s1]

| S.N. | Title      | Docking Energy |
|------|------------|----------------|
| 1.   | CMNPD27819 | -8.6           |
| 2.   | CMNPD1843  | -8.36          |
| 3.   | CMNPD4184  | -8.29          |
| 4.   | CMNPD3156  | -8.26          |
| 5.   | CMNPD22358 | -8.25          |
| 6.   | CMNPD4742  | -8.23          |
| 7.   | CMNPD4739  | -8.22          |
| 8.   | CMNPD1845  | -8.19          |
| 9.   | CMNPD23661 | -8.16          |
| 10.  | CMNPD1826  | -7.98          |
| 11.  | CMNPD8828  | -7.97          |
| 12.  | CMNPD4740  | -7.96          |
| 13.  | CMNPD17787 | -7.95          |
| 14.  | CMNPD1842  | -7.89          |
| 15.  | CMNPD4735  | -7.88          |
| 16.  | CMNPD21103 | -7.86          |
| 17.  | CMNPD2218  | -7.84          |
| 18.  | CMNPD447   | -7.81          |
| 19.  | CMNPD9489  | -7.81          |
| 20.  | CMNPD17806 | -7.77          |
| 21.  | CMNPD21101 | -7.74          |
| 22.  | CMNPD17807 | -7.74          |
| 23.  | CMNPD427   | -7.71          |
| 24.  | CMNPD5924  | -7.7           |
| 25.  | CMNPD26471 | -7.68          |
| 26.  | CMNPD17788 | -7.65          |
| 27.  | CMNPD27816 | -7.62          |
| 28.  | CMNPD433   | -7.56          |
| 29.  | CMNPD4733  | -7.56          |
| 30.  | CMNPD3668  | -7.55          |
| 31.  | CMNPD2605  | -7.55          |
| 32.  | CMNPD23660 | -7.54          |
| 33.  | CMNPD5366  | -7.51          |
| 34.  | CMNPD5923  | -7.49          |
| 35.  | CMNPD19974 | -7.49          |
| 36.  | CMNPD3667  | -7.46          |
| 37.  | CMNPD8048  | -7.45          |
| 38.  | CMNPD4181  | -7.44          |
| 39.  | CMNPD3662  | -7.42          |
| 40.  | CMNPD5377  | -7.4           |
| 41.  | CMNPD26472 | -7.35          |
| 42.  | CMNPD5922  | -7.35          |
| 43.  | CMNPD4732  | -7.27          |
| 44.  | CMNPD23659 | -7.26          |
| 45.  | CMNPD1844  | -7.25          |
| 46.  | CMNPD14000 | -7.22          |
| 47.  | CMNPD4183  | -7.21          |
| 48.  | CMNPD4738  | -7.18          |
| 49.  | CMNPD4734  | -7.17          |
| 50.  | CMNPD4731  | -7.14          |

**Table S1-** List of top 20 screened compounds and their docking energy

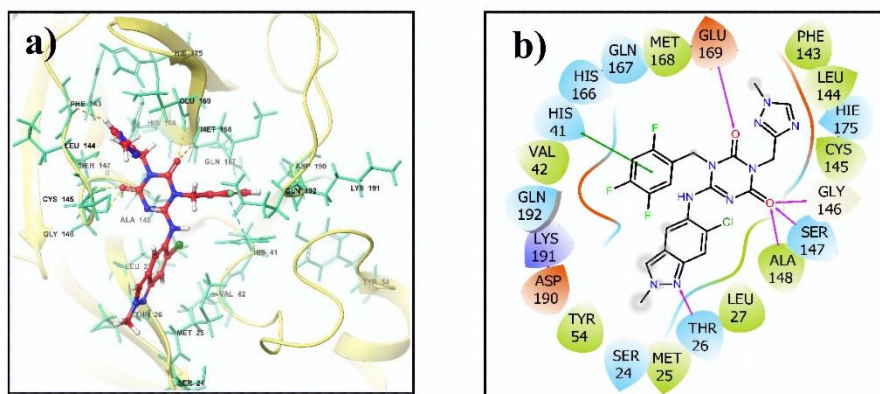

**Figure S1-** 3D and 2D interaction diagram of protein ligand interaction of MERS protease with control molecule 7YY.

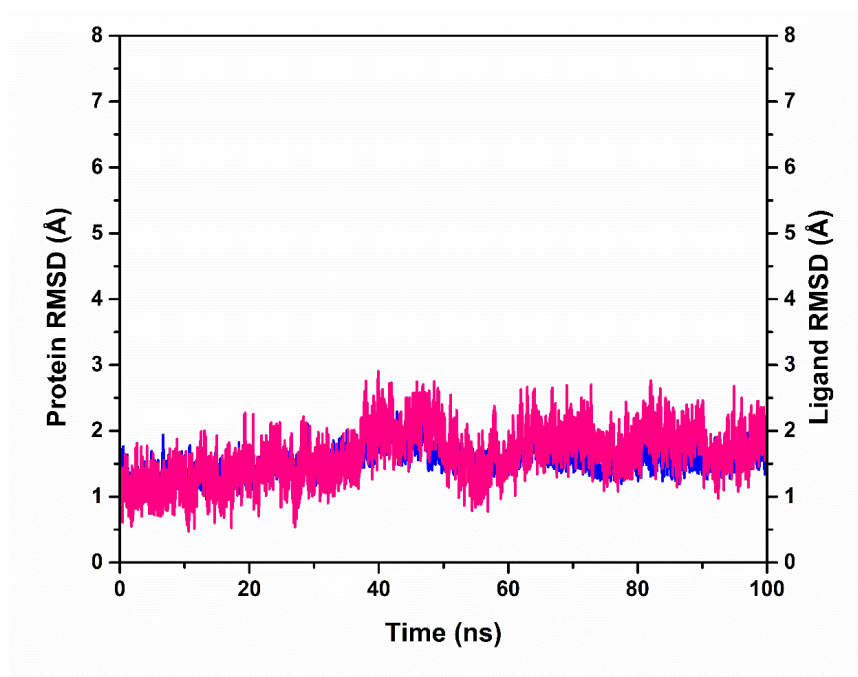

**Figure S2-** RMSD value resulting from MERS protease with control molecule-7YY during molecular dynamics simulation over 100 ns.

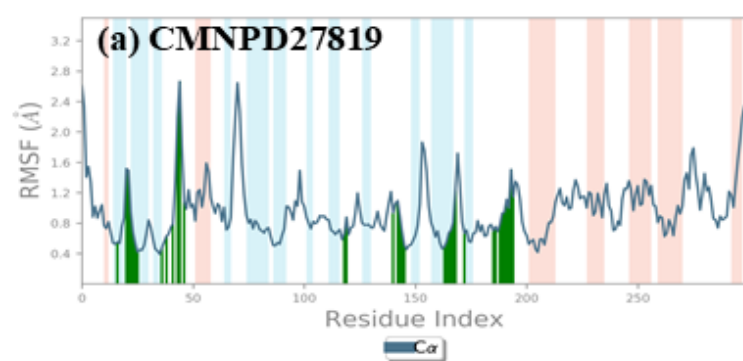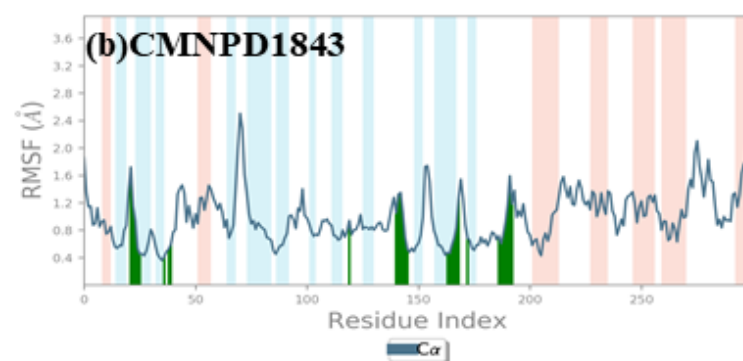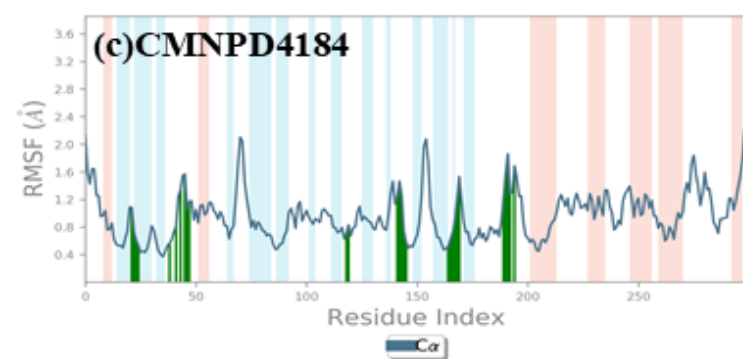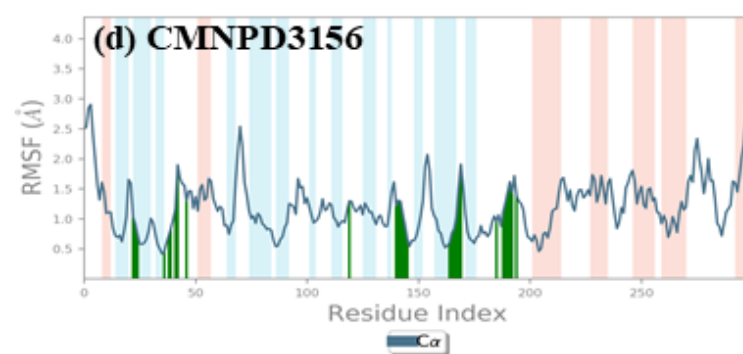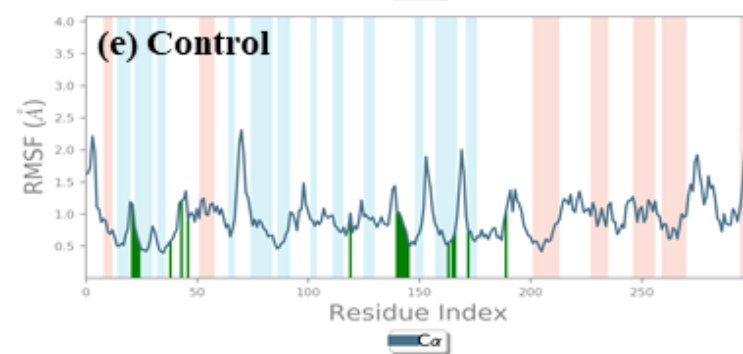

**Figure S3-** The protein root mean square fluctuation (P-RMSF) of docked protein-ligand complexes during 100ns simulation: a) Protease-CMNPD27819 complex, b) Protease-CMNPD1843 complex c) protease-CMNPD4184 complex, d) protease-CMNPD3156 complex, and e) protease-reference/control complex.

**(a) CMNPD27819**

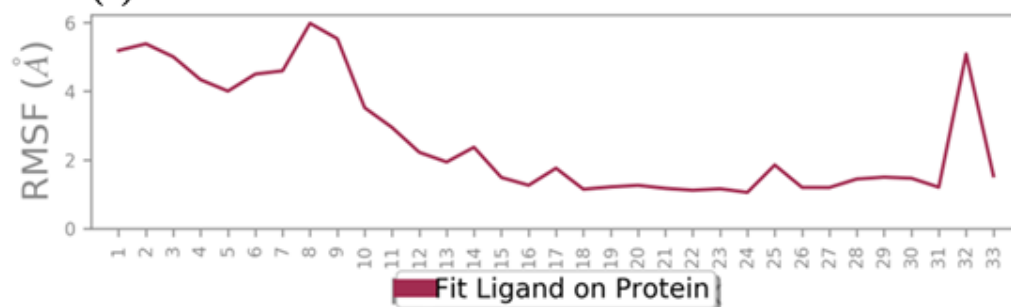

**(b) CMNPD1843**

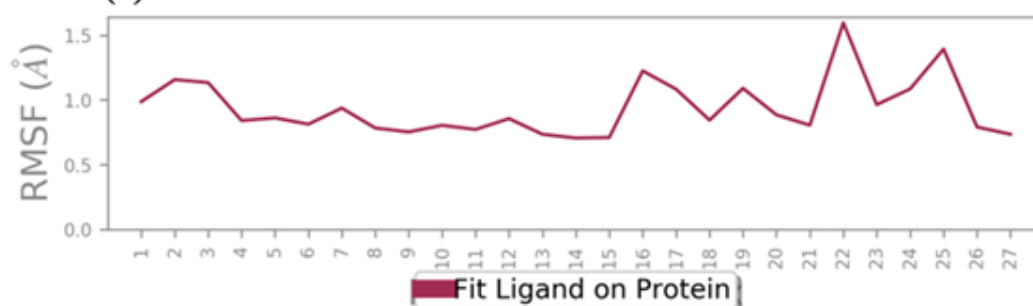

**(c) CMNPD4184**

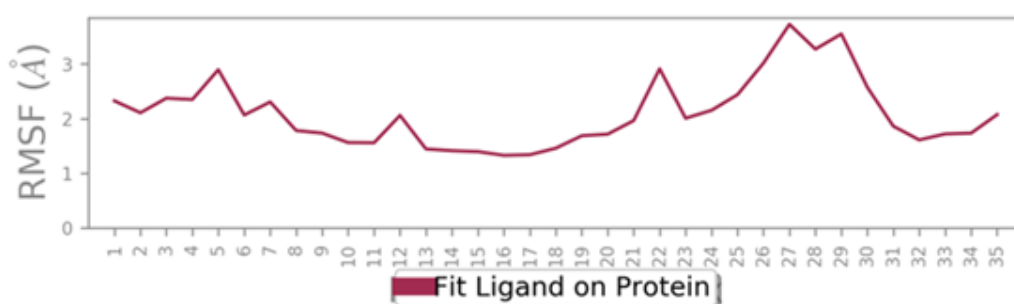

**(d) CMNPD3156**

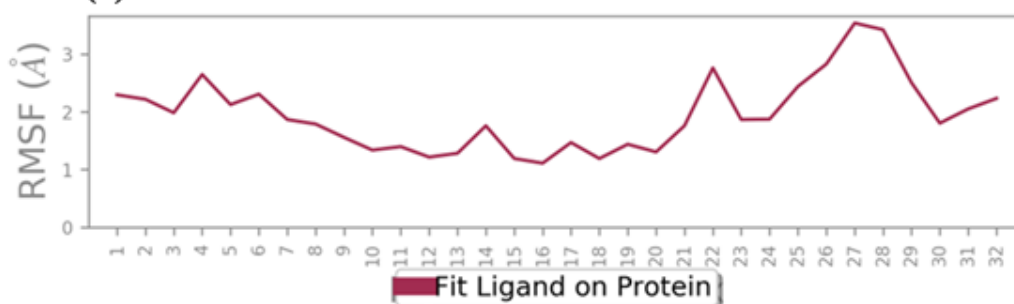

**(e) Control**

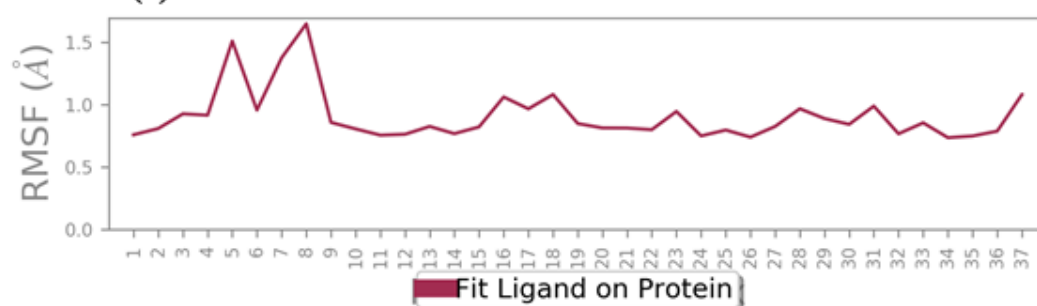

**Figure S4-** The Ligand root mean square fluctuation (L-RMSF) of docked protein-ligand complexes during 100ns simulation: a) Protease-CMNPD27819 complex, b) Protease-CMNPD1843 complex c) protease-CMNPD4184 complex, d) protease-CMNPD3156 complex, and e) protease- reference/control complex.

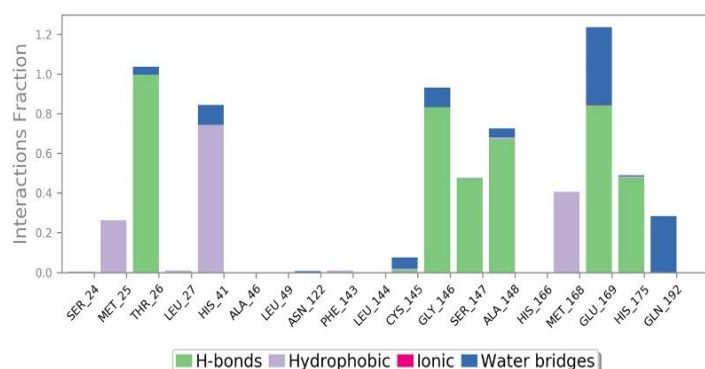

**Figure S5-** Protein-ligand interactions contact mapping of MERS protease with control molecule during 100ns simulation.

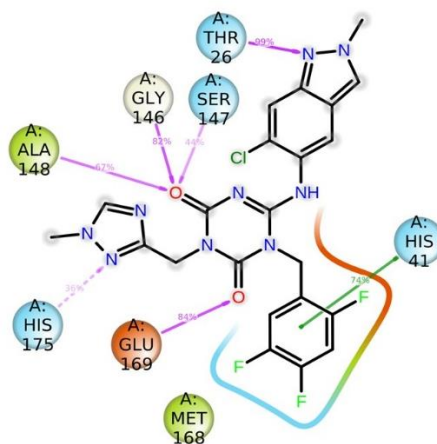

**Figure S6-** The ligand-protein contact of MERS protease with control molecule during 100ns simulation.

| S. no. | Complex                        | H-Bond                                                                                                                           | Hydrophobic                             | $\pi$ - $\pi$ stacking/<br>$\pi$ - $\pi$ cation* |
|--------|--------------------------------|----------------------------------------------------------------------------------------------------------------------------------|-----------------------------------------|--------------------------------------------------|
| 1      | MERS protease-CMNP27819        | Val <sup>193</sup> , Gln <sup>195</sup> ,<br>Glu <sup>169</sup>                                                                  | Val <sup>193</sup>                      | --                                               |
| 2      | MERS protease -<br>CMNP1843    | Glu <sup>169</sup> , Gln <sup>167</sup> ,<br>Lys <sup>191</sup>                                                                  | Met <sup>169</sup> , Ala <sup>148</sup> | --                                               |
| 3      | MERS protease-CMNP4184         | Gln <sup>192</sup>                                                                                                               | --                                      | --                                               |
| 4      | MERS protease-CMNP3156         | Val <sup>193</sup>                                                                                                               | Val <sup>193</sup>                      | --                                               |
| 5      | MERS protease-Control<br>(7YY) | Glu <sup>169</sup> , His <sup>175</sup> ,<br>Ala <sup>148</sup> , Gly <sup>146</sup> ,<br>Ser <sup>147</sup> , Thr <sup>26</sup> | Ala <sup>148</sup> , Met <sup>168</sup> | His <sup>41</sup>                                |

**Table S2** - Intermolecular interaction for the selected compound post dynamic analysis of MERS protease. \* mark indicate the \*  $\pi$ - cation is the interaction involved in the post dynamic analysis reference complex.

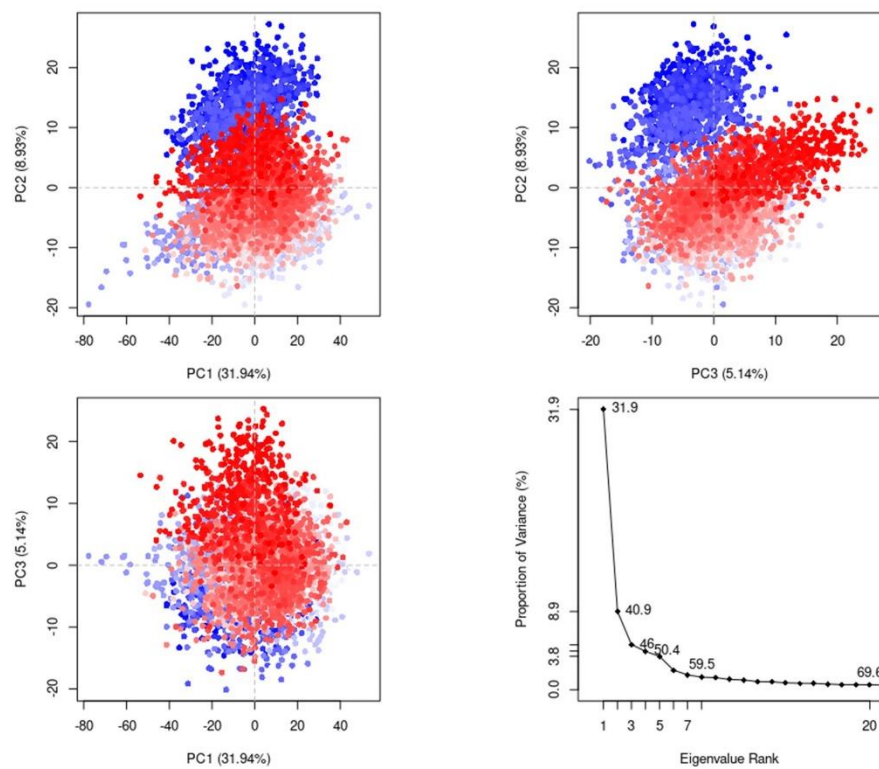

**Figure S7-** Principal component analysis for the generated for the reference molecule with docked MERS-protease protein target.
